# Supplementary material
Source: publisher site journal article supplement (https://www.dovepress.com/article/363871)
Supplement: Supplementary file 1 [file get_supplementary_file.php]

**Appendix 1: The interview guide**

Date: __________________ Participants code:_______________

**Demographic data**

1. Gender
2. Age
3. Nursing cadre
4. Type of training
5. Inclusion of ART in the training content

**Questions and probes**

1. Would you explain the challenges that you face when providing hormonal contraceptives to women on ART? (personal, facility, management challenges, challenges on clients)
2. Would you explain the effect of those challenges that you encountered? (both positive and negative on clients, facility and you personally)

Would you explain the solutions to the challenges that you encounter? (personal, facility, management and clients).

How would you wish that clients on ART be treated?
